# Supplementary material
Source: PubMed Central journal article supplement (PMC6602098)
Supplement: Supp_FigureS1-S2.pdf [file Supp_FigureS1-S2.pdf]

## Supplementary Data

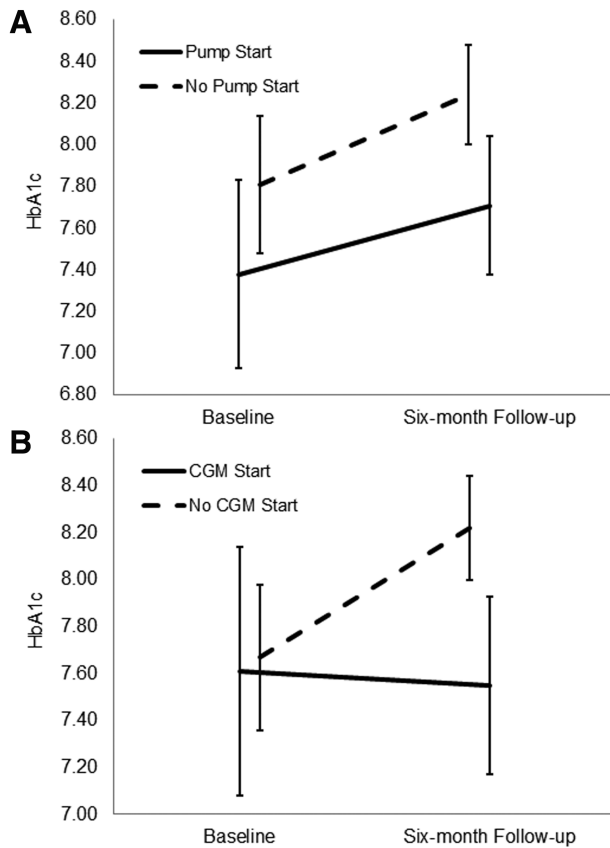

**SUPPLEMENTARY FIG. S1.** (A) The change in HbA1c from baseline to 6-month follow-up for children starting a pump between baseline and 6-month follow-up and children not starting a pump between baseline and 6-month follow-up. (B) The change in HbA1c from baseline to 6-month follow-up for children starting a CGM between baseline and 6-month follow-up and children not starting a CGM between baseline and 6-month follow-up. Error bars represent 95% confidence intervals. CGM, continuous glucose monitor; HbA1c, hemoglobin A1c.

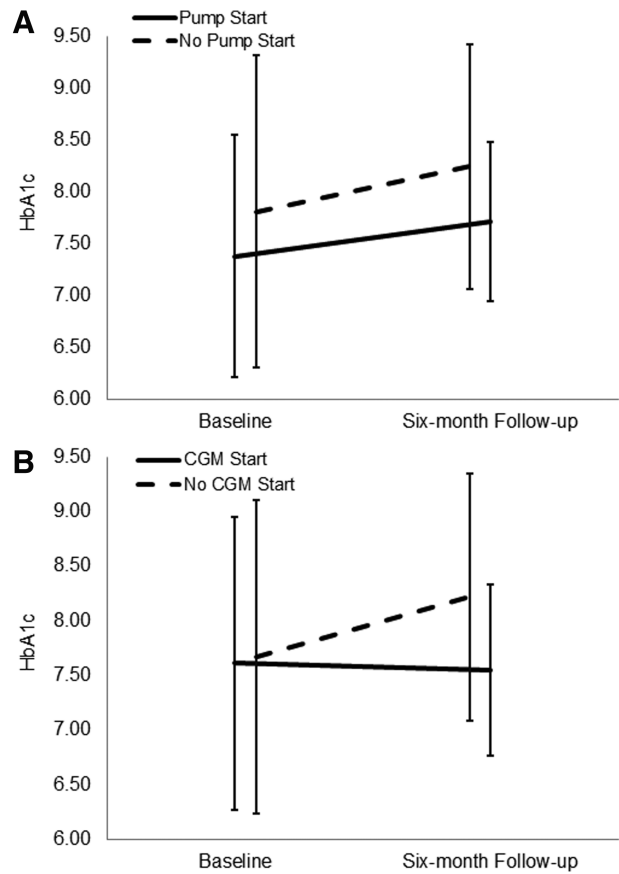

**SUPPLEMENTARY FIG. S2.** (A) The change in HbA1c from baseline to 6-month follow-up for children starting a pump between baseline and 6-month follow-up and children not starting a pump between baseline and 6-month follow-up. (B) The change in HbA1c from baseline to 6-month follow-up for children starting a CGM between baseline and 6-month follow-up and children not starting a CGM between baseline and 6-month follow-up. Error bars represent  $\pm 1$  standard deviation.
